# Supplementary material
Source: PubMed Central journal article supplement (PMC6817362)
Supplement: EMS83327-supplement-1.pdf [file EMS83327-supplement-1.pdf]

# **Protection against influenza infection requires early recognition by inflammatory dendritic cells through C-type lectin receptor SIGN-R1**

Miguel Palomino-Segura, Laurent Perez, Yagmur Farsakoglu, Tommaso Virgilio, Irene Latino, Rocco D'Antuono, Nikolaos Chatziandreou, Diego U. Pizzagalli, Guojun Wang, Adolfo García-Sastre, Federica Sallusto, Michael C. Carroll, Olivier Neyrolles, and Santiago F. Gonzalez.

## **Supplementary information**

Supplementary Figures 1-6

Supplementary Table 1 and 2

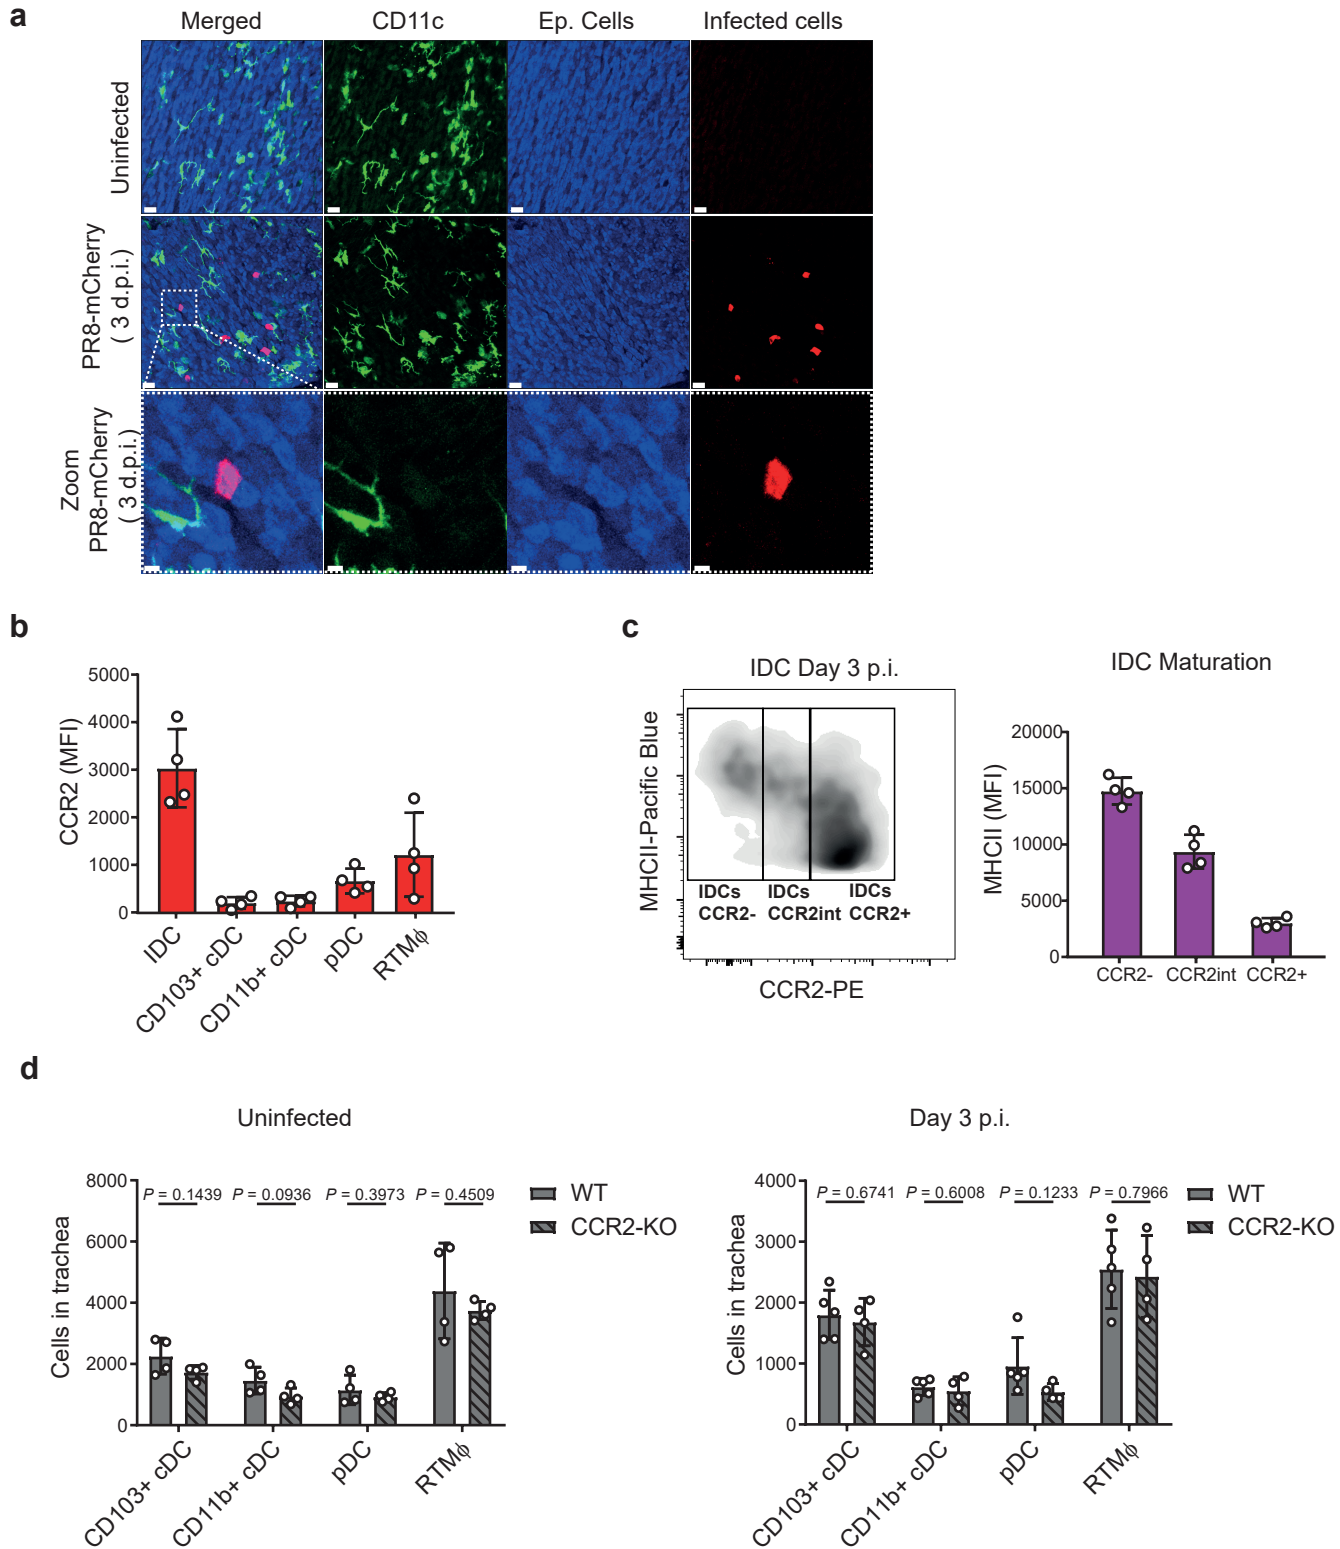

**Supplementary Figure 1.** **a**, Confocal micrographs from tracheal explants showing the network of CD11c+ cells (green) and the epithelial cells (blue) from uninfected and infected mice at day 3 p.i.. Mice were infected with a recombinant influenza virus that carried a mCherry-reporter gene in the NS segment (PR8-mCherry), which allowed the visualisation of infected cells (red). The scale bar represents 20 $\mu$ m in the first two rows and 5 $\mu$ m in the third row (magnified panels). **b**, Flow cytometry data showing expression levels of CCR2 in subsets of tracheal DC and RTM $\phi$  (n = 4 mice). **c**, Representative scatterplot (left) and quantification graph (right) of mouse tracheal IDC at day 3 p.i. showing how the loss of CCR2 expression correlates with the upregulation of the maturation marker MHCII. According to this, IDC were divided in three populations (CCR2-, CCR2 int, CCR2+) based on their CCR2 expression (n = 4 mice). **d**, Flow cytometric analysis of tracheal DC and RTM $\phi$  from WT and CCR2-KO in uninfected conditions (left) and at day 3 p.i. (right) (n = 4 and 5 mice per respective time). The presented data are representative of at least three independent experiments. Results are given as mean  $\pm$  SD. Data were analysed using the two-tailed Student's t-test.



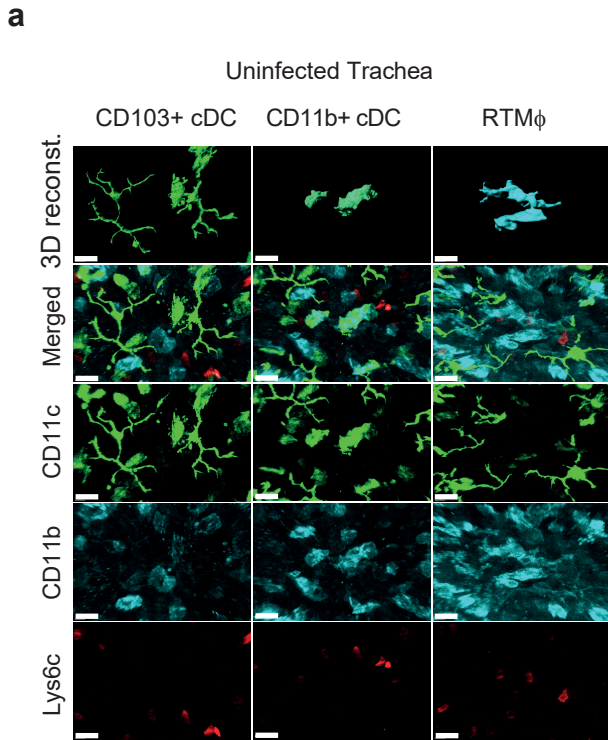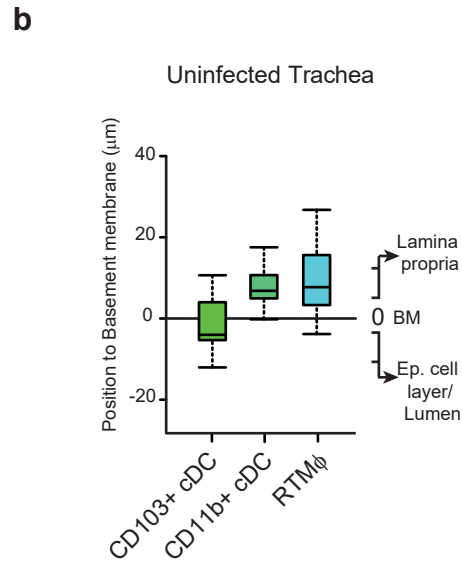

**Supplementary Figure 2. a**, Representative confocal micrographs showing the 3D reconstruction of the DC subsets and RTM $\phi$ , located in the tracheal mucosa of a WT animal. Cells are characterised based on the expression of CD11c (green), CD11b (light blue) and Ly6c (red). CD103+ cDC are defined as: CD11c+ / CD11b- / Ly6c-; CD11b+ cDC: CD11c+ / CD11b+ / Ly6c-; and RTM $\phi$  CD11c- / CD11b+ / Ly6c-. Scale bar represents 20  $\mu$ m. **b**, Box plot representing the position of the different group of cells with respect to the basement membrane in the tracheal mucosa of a control animal. The value of the position of the basement membrane was considered 0, cells located towards the lamina propria received positive values while cells located towards the luminal side received negative values. (data are based in the analysis of 3 confocal reconstructions; IDC, n = n.d. ; CD103+ cDC, n = 58; CD11b+ cDC, n = 70; RTM $\phi$ , n =75). The presented data are representative of at least three independent experiments. In **b**, the box plots show 25th to 75th percentiles and median, and the whiskers show 5th to 95th percentiles.

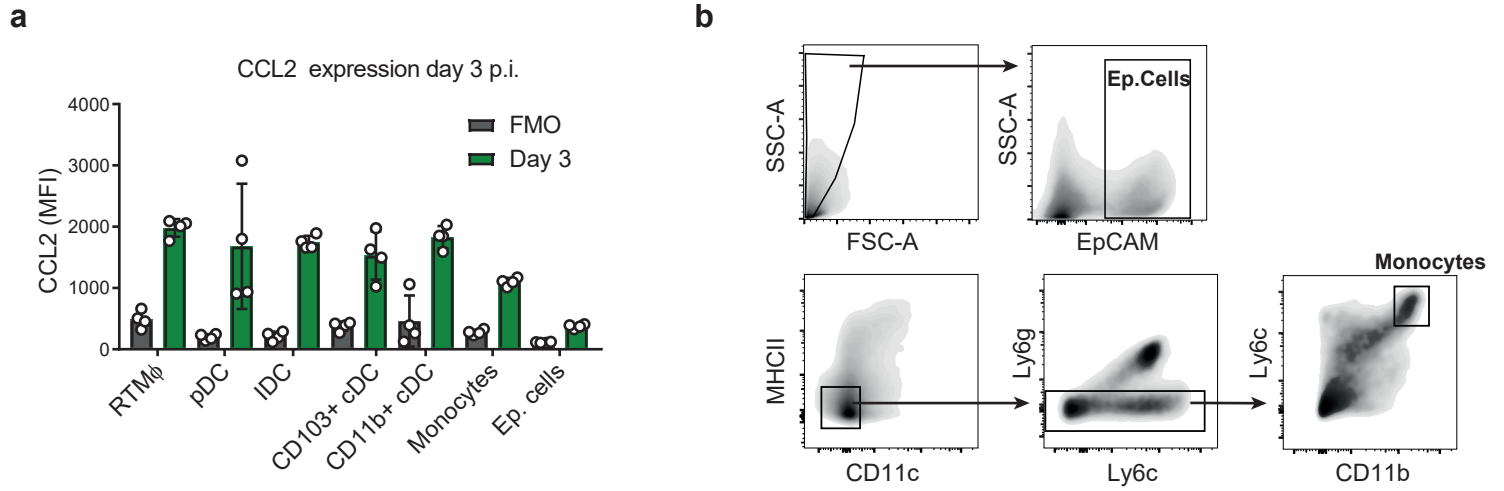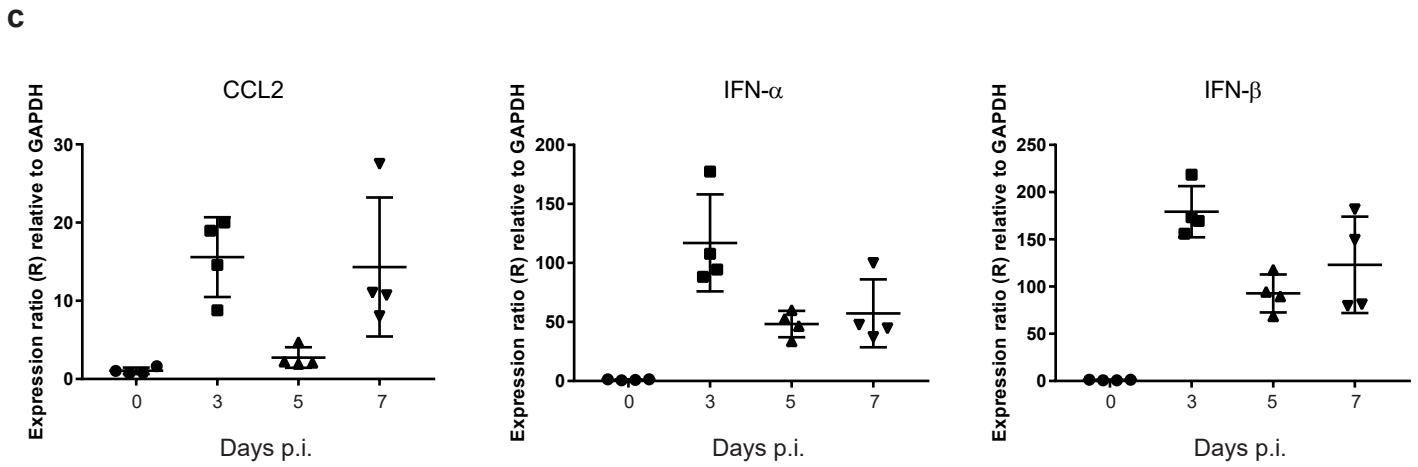

**Supplementary Figure 3.** a, Flow cytometric analysis showing the intracellular expression levels of CCL2 in tracheal cells at day 3 p.i. compared to the fluorescence-minus-one (FMO) control (n = 4 mice per group). b, Flow cytometric characterisation of epithelial cells (EpCAM+) and monocytes (CD45+ / MHCII- / CD11c- / CD11b+ / Ly6chi / Ly6g-). c, Time course showing RNA expression levels of the cytokines CCL2, IFN- $\alpha$  and IFN- $\beta$  in tracheas from PR8 infected mice at 0, 3, 5 and 7 days p.i. (n = 4 mice per group). The presented data are representative of at least three independent experiments. Results are given as mean  $\pm$  SD.

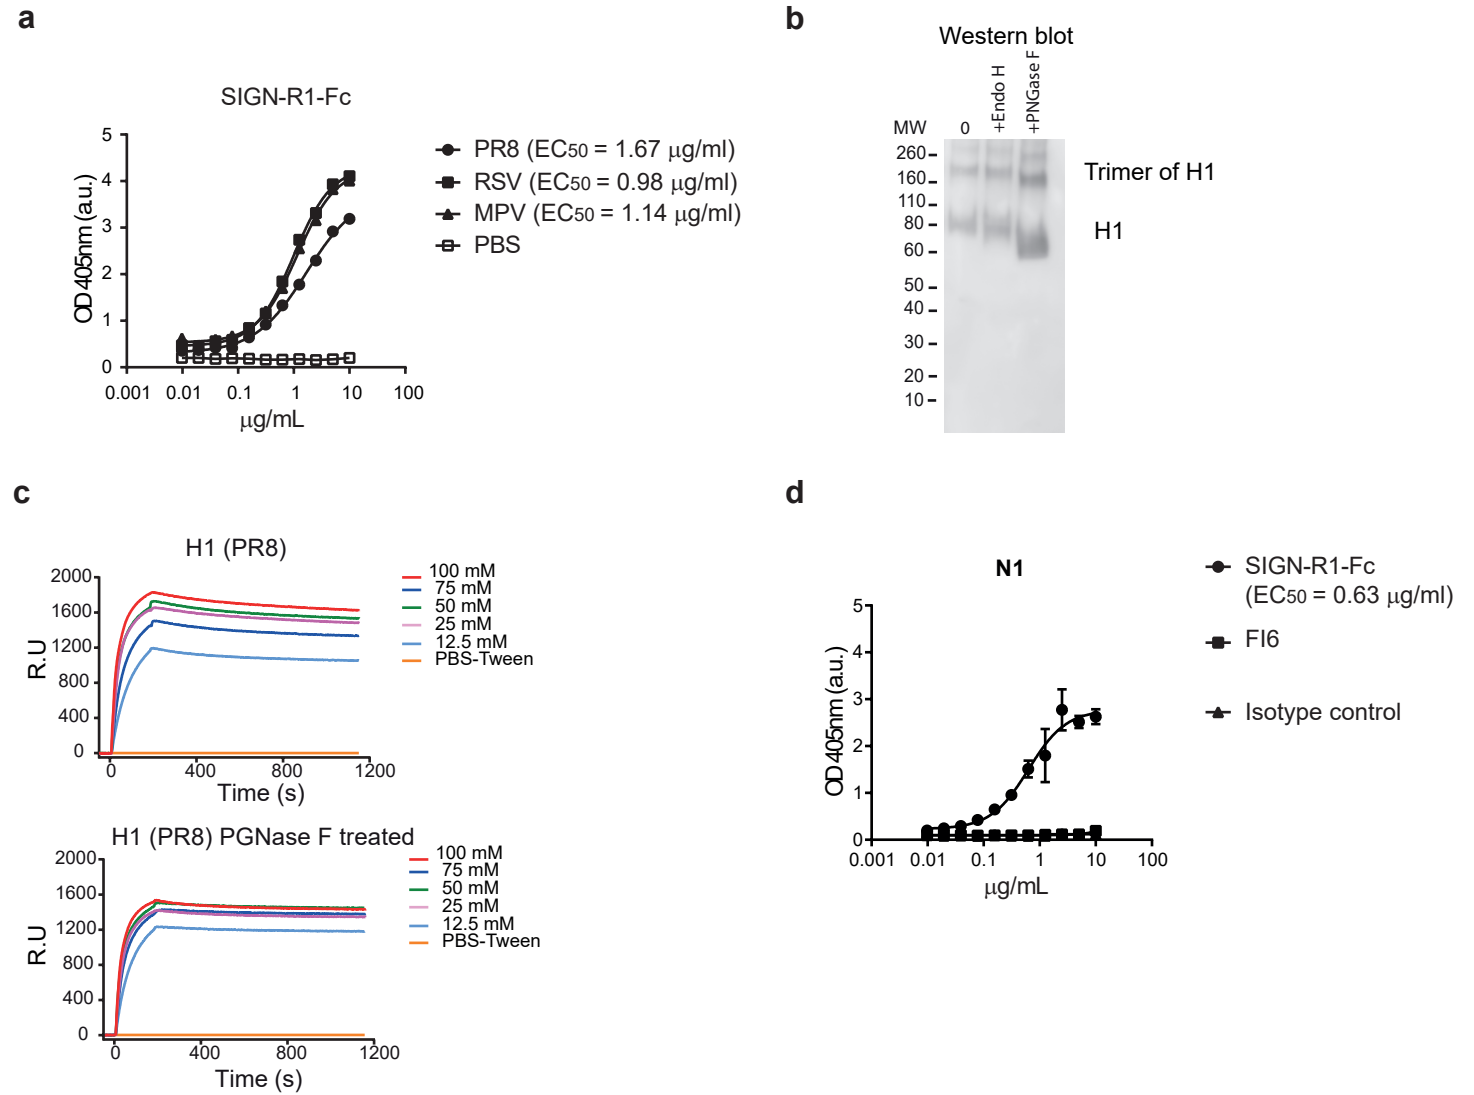

**Supplementary Figure 4. SIGN-R1 interacts with strong affinity with N-linked glycans.** **a**, ELISA analysis of SIGN-R1-Fc binding to PR8, RSV and MPV. The absorbance at 405 nm is plotted against increasing concentrations of recombinant SIGN-R1-Fc ( $n = 2$  replicates per group). **b**, Western blot analysis of deglycosylated H1 by PNGase F glycosidase. After 1 h of treatment H1 is completely deglycosylated by PNGase F and migrate at a lower molecular weight in a reducing SDS-PAGE. **c**, SPR analysis of untreated and PGNase F-treated H1 reveal no change in affinity when H36-7 mAb is used, indicating that H1 is correctly folded. **d**, ELISA analysis of SIGN-R1-Fc binding to N1. The absorbance at 405nm is plotted against the concentration of antibody added to wells with the same concentration of recombinant N1. (SIGN-R1,  $n = 3$ ; FI6,  $n = 3$ ; Isotype control,  $n = 2$  replicates per group). The presented data are representative of at least of two independent experiments (**a-d**). Results are given as mean  $\pm$  SD (**a**) or mean alone (**d**).

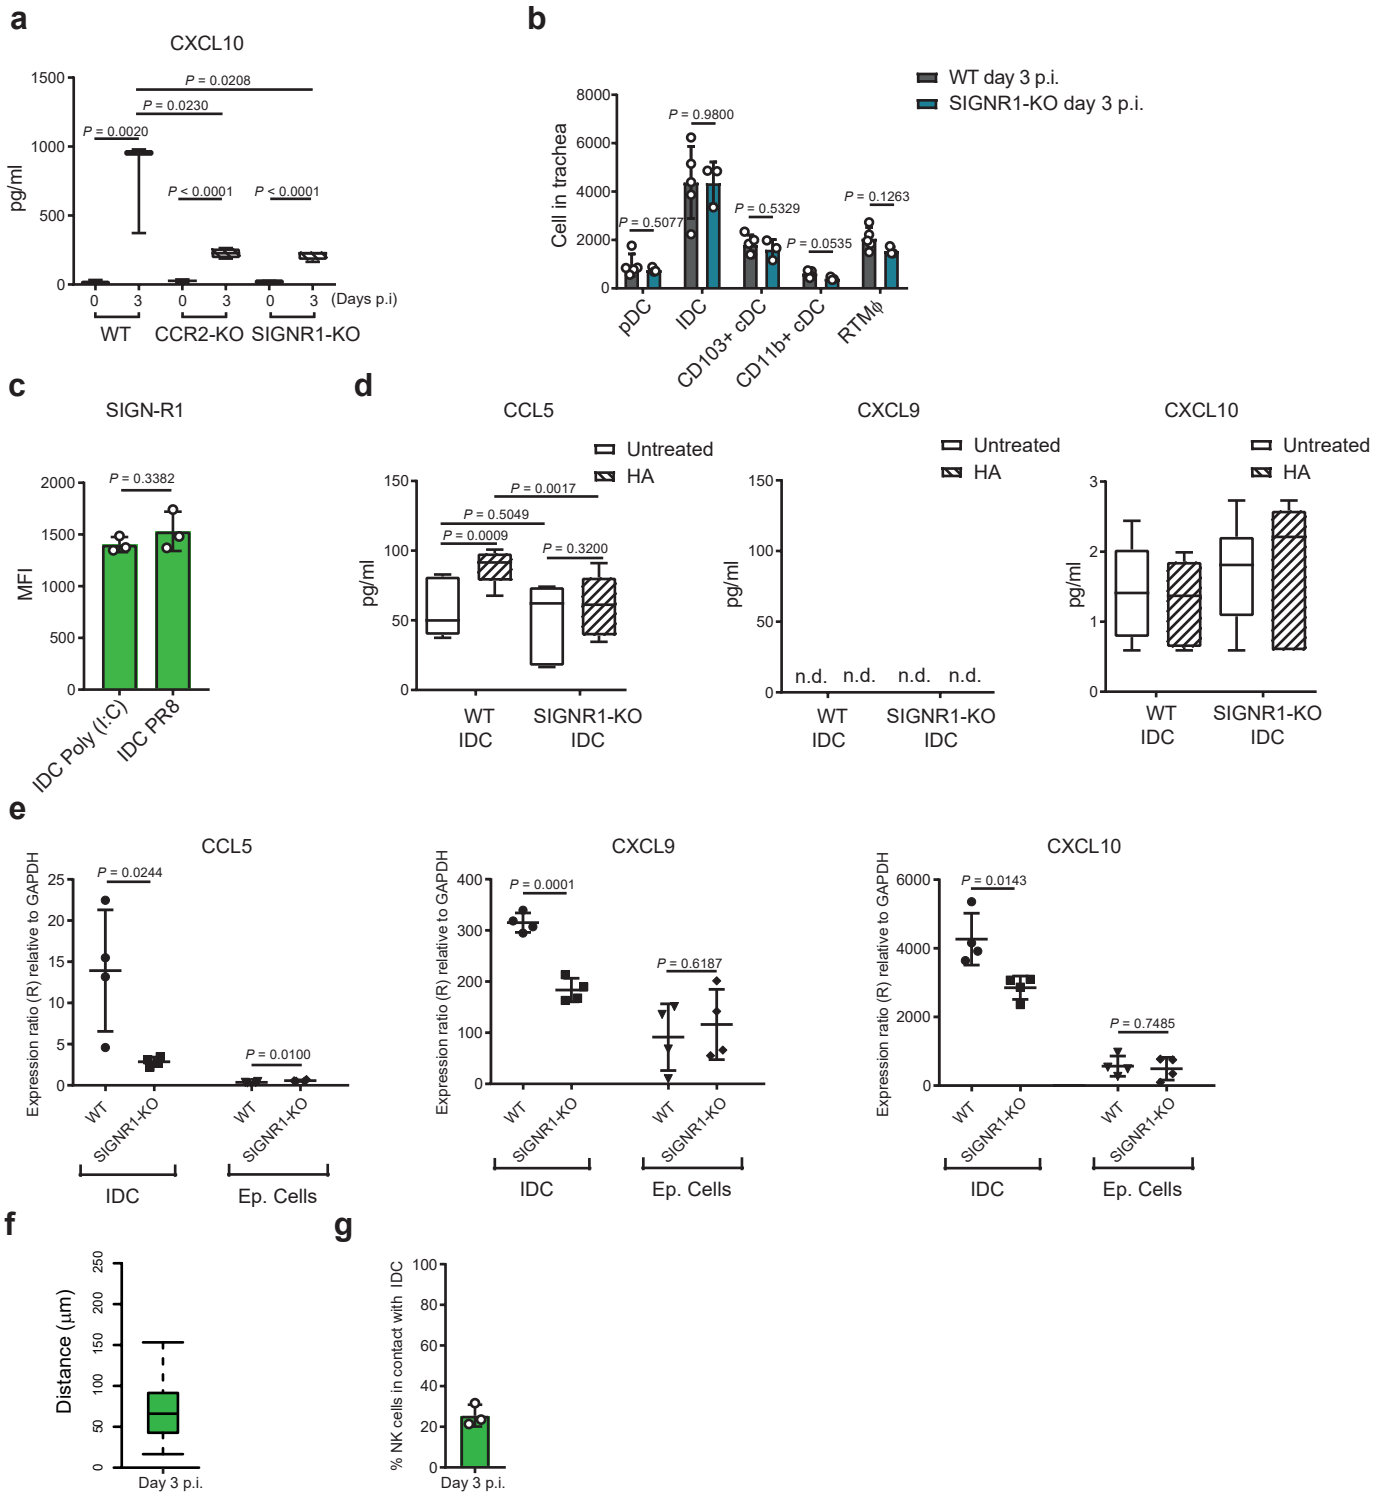

**Supplementary Figure 5.** **a**, Levels of secreted CXCL10 in trachea from CCR2-KO, SIGNR1-KO and WT mice at 0 and 3 days p.i. (WT, n = 5 and 3; CCR2-KO, n = 4 and 4; SIGNR1-KO, n = 4 and 4 mice per respective time point). **b**, Flow cytometric analysis of tracheal DC and RTMφ from WT and SIGNR1-KO at day 3 p.i. (WT, n = 5; SIGNR1-KO, n = 3 mice per group). **c**, Flow cytometric analysis showing the expression levels of SIGN-R1 in IDC generated by intranasal administration of 40  $\mu\text{g}/\text{mice}$  of Poly (I:C) and in tracheal IDC at day 3 p.i. (n = 3 mice per group). **d**, Cytokine levels of secreted CCL5, CXCL9 and CXCL10 by Poly (I:C)-generated IDC from WT and SIGNR1-KO mice after 12 hours of *in vitro* culture with Inflexal® V (WT, n = 8; SIGNR1-KO, n = 10 mice per group). **e**, RNA expression levels of the CCL5, CXCL9 and CXCL10 in sorted IDC and epithelial cells from infected WT and SIGNR1-KO mice at day 3 p.i. (n = 4 mice per group). **f**, Box plot representing the distance between tracheal NK cells and the nearest neighbour cell in the IDC population at day 3 p.i. (data are based on the analysis of 3 confocal reconstructions; NK cells, n = 102). **g**, Frequency of tracheal NK cells that are in contact with an IDC at day 3 p.i.. Contact between cells was considered when their distance (closest voxels) is less than or equal to 5  $\mu\text{m}$  (data are based on the analysis of 3 confocal reconstructions). The presented data are representative of at least three independent experiments (**a-c** and **e-g**) or at least two independent pooled experiments (**e**). In **a**, **d** and **f**, the box plots show 25th to 75th percentiles and median, and the whiskers show minimum and maximum values (**a**, **d**) or 5th to 95th percentiles (**f**). In **b**, **c**, **e**, and **g**, results are given as mean  $\pm$  SD. Data were analysed using the two-tailed Student's t-test.

**a**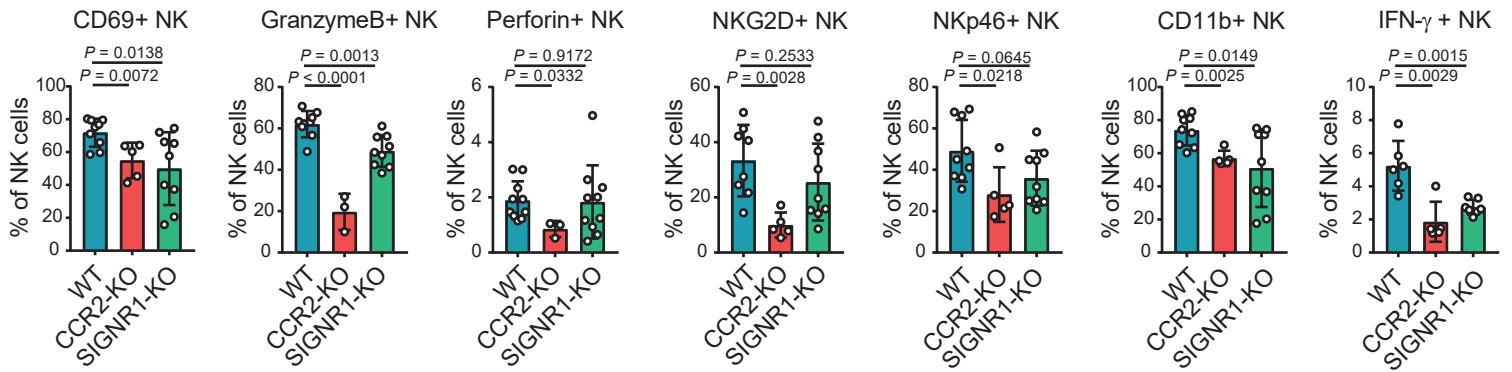**b**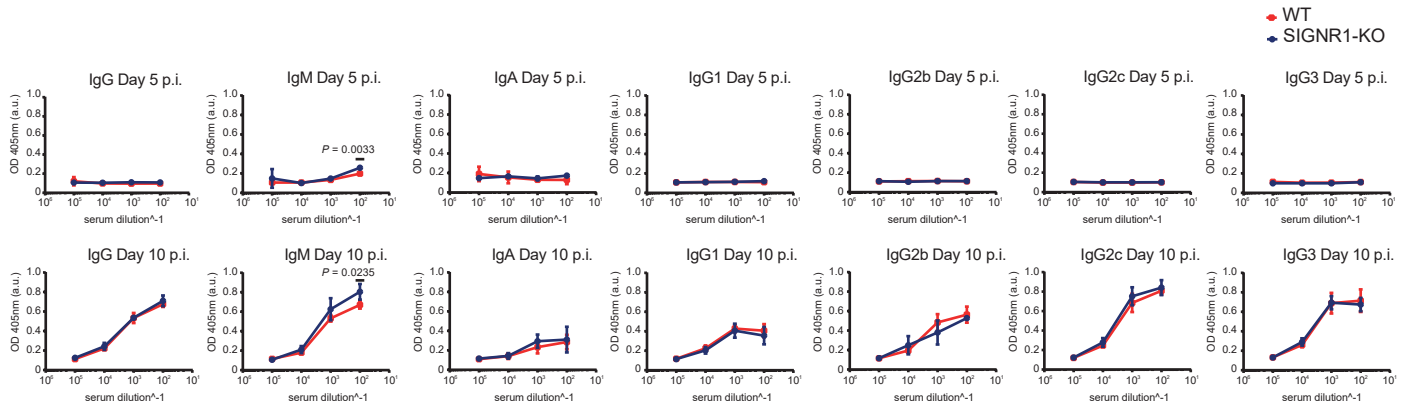**c**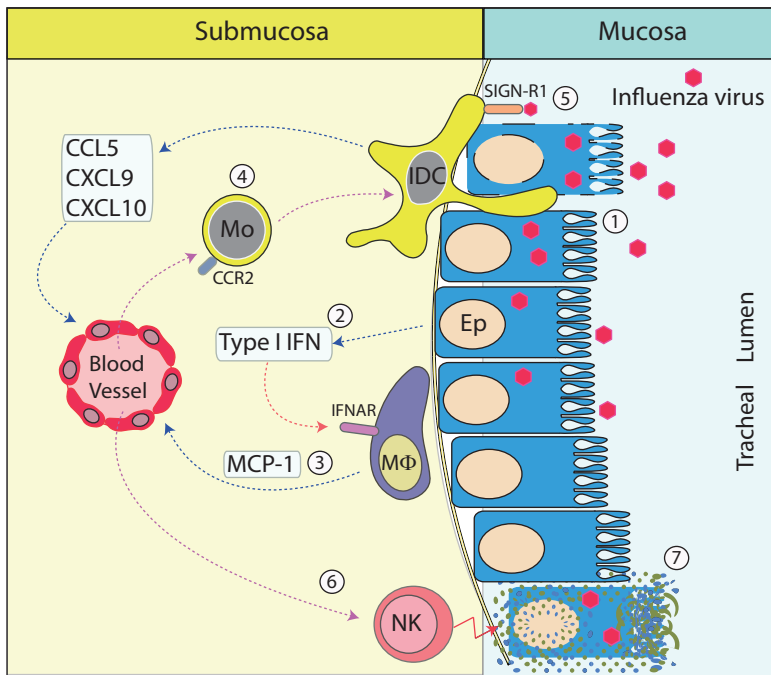

**Supplementary Figure 7. a**, Flow cytometric quantification of frequency of CD69+, granzymeB+, perforin+, NKG2D+, NKp46+, CD11b+ and IFN-γ+ NK cells in WT, SIGNR1-KO and CCR2-KO animals at day 3 p.i. (WT, n = 9, 9, 10, 8, 9, 9 and 6; CCR2-KO, n = 5, 3, 3, 5, 5, 5, and 5; SIGNR1-KO, n = 9, 9, 10, 9, 9, 9, and 8 mice per respective marker). **b**, ELISA of serum collected from WT and SIGNR1-KO mice at day 5 and 10 p.i. indicating the absorbance of PR8-specific antibodies detected in serial dilutions of serum (n = 4 per group). **c**, Proposed working model. Epithelial cells (Ep) get infected in the lumen of the trachea (1) and initiate the Type I IFN response (2), which in turns induce the activation of macrophages (MΦ) and the production MCP-1 (3). The release of this chemokine in the bloodstream induces the recruitment of CCR2 expressing monocytes (Mo) (4), which then differentiate into inflammatory dendritic cells (IDC) and relocate towards the luminal part of the trachea. The majority of the IDC express the C-type lectin receptor SIGN-R1 that mediates the recognition of the virus (5), the activation of the IDC and regulated the production of the chemokine CCL5, CXCL9 and CXCL10. The latter induced the recruitment of NK cells (6), which control the replication of the virus in the epithelium (7). The presented data are representative of at least two independent pooled experiments (a) or at least three independent experiments (b). In a and b, results are given as mean ± SD. Data were analysed using the two-tailed Student's t-test.

**Supplementary Table 1. List of antibodies.**

| <b>Antibody target</b>  | <b>Clone</b>                  | <b>Color</b>             | <b>Manufacturer</b>       |
|-------------------------|-------------------------------|--------------------------|---------------------------|
| αLy-6C                  | HK1.4                         | PE, Biotin               | Biolegend                 |
| αF4/80                  | BM8                           | APC/Cy7, AF488           | Biolegend                 |
| αB220                   | RA3-6B2                       | AF647, PE/Cy7,<br>BV605  | Biolegend                 |
| αCD103                  | 2E7                           | AF647, AF488             | Biolegend                 |
| αCD11b                  | M1/70                         | AF488, BV785,<br>AF647   | Biolegend                 |
| αI-A/I-E (MHCII)        | M5/114.15.2                   | Pacific Blue, BV650      | Biolegend                 |
| αEpCAM                  | G8.8                          | PE/Cy7                   | eBioscience               |
| αCD45                   | 30-F11                        | AF700                    | Biolegend                 |
| αCD45.2                 | 104                           | PE/Cy7                   | Biolegend                 |
| αCD11c                  | N418                          | AF647, APC/Cy7,<br>Bv711 | Biolegend                 |
| αIFN-β                  | RMMB-1                        | FITC                     | PBL assay science         |
| αCCL2                   | 2H5                           | Pacific Blue*            | BioXcell                  |
| αSIGN-R1                | 22D1                          | CF405M**,<br>Atto647***  | BioXcell                  |
| Armenian hamster<br>IgG | (αSIGN-R1 isotype<br>control) | Pure                     | BioXcell                  |
| αCCL5                   | 2E9/CCL5                      | PE                       | Biolegend                 |
| αCXCL9                  | MIG-2F5.5                     | AF647                    | Biolegend                 |
| αCD3ε                   | eBio500A2                     | eFluor450                | eBioscience               |
| αNK1.1                  | PK136                         | AF488, PerCP-Cy5.5       | Biolegend,<br>eBioscience |
| αCCR5                   | HM-CCR5                       | PE                       | Biolegend                 |
| αCXCR3                  | CXCR3-173                     | PE                       | Biolegend                 |
| αCCR2                   | 475301                        | PE                       | R&D Systems               |

|            |            |           |             |
|------------|------------|-----------|-------------|
| αCD69      | H1.2F3     | FITC      | Biolegend   |
| αGranzymeB | GB11       | AF647     | Biolegend   |
| αPerforin  | eBioOMAK-D | PE        | eBioscience |
| αNKG2D     | CX5        | APC       | Biolegend   |
| αNKp46     | 29A1.4     | eFluor450 | eBioscience |
| αIFN-γ     | XMG1.2     | BV785     | Biolegend   |
| αLy-6G     | 1A8        | BV711     | Biolegend   |
| αCD16/32   | 93         | Pure      | Biolegend   |
| αGr-1      | RB6-8C5    | AF488     | Biolegend   |
| αCD31      | 390        | AF647     | Biolegend   |

\* In-house labelled with Pacific Blue™ Antibody Labelling Kit (ThermoFisher Scientific), \*\* In-house labelled with CF405M Mix-n-Stain™ Antibody Labelling Kit (Biotium), \*\*\* In-house labelled with Atto 647 NHS ester (Atto-Tec).



**Supplementary Table 2. List of primers.**

| <b>Accession number</b> | <b>Gene</b>                   | <b>Forward Primer (Direction 5'-3')</b> | <b>Reverse Primer (Direction 5'-3')</b> |
|-------------------------|-------------------------------|-----------------------------------------|-----------------------------------------|
| 111654                  | <i>Ifn<math>\alpha</math></i> | CTGCTGGCTGTGAGGA                        | CACCTCCCAGGCACA                         |
| 15977                   | <i>Ifn<math>\beta</math></i>  | TGTCCTCAACTGCTCTCCAC                    | AAGATCTCTGCTCGGACCAC                    |
| 20296                   | <i>Ccl2</i>                   | CTCTTCCTCCACCACCATGC                    | GGTGAATGAGTAGCAGCAGGT                   |
| 16173                   | <i>Il18</i>                   | GGTTCCATGCTTTCTGGACT                    | GGCCAAGAGGAAGTGATTTG                    |
| 20304                   | <i>Ccl5</i>                   | GCCAACCCAGAGAAGAAGTG                    | AGCAAGCAATGACAGGGAAG                    |
| 17329                   | <i>Cxcl9</i>                  | CTTTTGGGCATCATCTTCCT                    | TTGAGGTCTTTGAGGGATTTG                   |
| 15945                   | <i>Cxcl10</i>                 | CGTCATTTTCTGCCTCATCC                    | TTCCCTATGGCCCTCATTCT                    |
| 14433                   | <i>GAPDH</i>                  | ACATCATCCCTGCATCCACT                    | AGATCCACGACGGACACATT                    |
